# Supplementary material
Source: Springer Nature journal article supplement (https://www.springermedizin.de/resource/supplementary/12981_2010_162_MOESM1_ESM.pdf/9603960)
Supplement: MOESM1 [file 9603960]

600 Subjects Enrolled  
No Food N=300      Food N=300

7 subjects excluded for incomplete Phase I survey

593 Subjects  
No Food N=294      Food N=299

105 subjects excluded\* from 6-Month Analysis:  
35 incomplete Phase II survey  
40 had active TB at Phase I or II  
25 pregnant at Phase II  
8 changed food status\*\*

253 subjects excluded\* from 12-Month Analysis:  
54 incomplete Phase II survey  
44 had active TB at Phase I or II  
44 pregnant at Phase III  
129 changed food status\*\*

488 Subjects  
No Food N=251<sup>¶</sup>      Food N=237

340 Subjects  
No Food N=125<sup>¶¶</sup>      Food N=215<sup>¶</sup>

6-Month Analysis

12-Month Analysis
